# Supplementary material for: Mechanistic insights into the oxidative coupling of methane over a Li/MgO catalyst: an experimental and microkinetic modeling study
Source: Royal Society of Chemistry journal article supplement (doi:10.1039/d4cy01132e), 2024-01-01
Supplement: d4cy01132e1.pdf [file d4cy01132e1.pdf]

## Supporting Information

### **Mechanistic insights into the oxidative coupling of methane over Li/MgO catalyst: An experimental and microkinetic modeling study**

Zaili Xiong<sup>a</sup>, Jijun Guo<sup>a</sup>, Yuwen Deng<sup>a</sup>, Meirong Zeng<sup>b</sup>, Zhandong Wang<sup>c</sup>, Zhongyue Zhou<sup>a</sup>, Wenhao Yuan<sup>a\*</sup>, Fei Qi<sup>a</sup>

<sup>a</sup> School of Mechanical Engineering, Shanghai Jiao Tong University, Shanghai 200240, P. R. China

<sup>b</sup> College of Smart Energy, Shanghai Jiao Tong University, Shanghai 200240, P. R. China

<sup>c</sup> National Synchrotron Radiation Laboratory, University of Science and Technology of China, Hefei, Anhui 230029, P. R. China

---

\* Corresponding author. E-mail: [yuanwh@sjtu.edu.cn](mailto:yuanwh@sjtu.edu.cn) (Wenhao Yuan)

**Table S1.** The used photoionization cross sections (PICSs) for quantification of measured mole fractions in OCM catalyzed by Li/MgO.

| <i>m/z</i> | Species                                       | Ionization energy (eV) | PICS                    |      |
|------------|-----------------------------------------------|------------------------|-------------------------|------|
|            |                                               |                        | Value (Mb)              | Ref. |
| 15.03      | CH <sub>3</sub> (methyl)                      | 9.84                   | 4.33 (11.5 eV)          | 1    |
| 16.03      | CH <sub>4</sub> (methane)                     | 12.61                  | Standard gas experiment | -    |
| 18.01      | H <sub>2</sub> O (water)                      | 12.62                  | 12.39 (14.5 eV)         | 2    |
| 26.04      | C <sub>2</sub> H <sub>2</sub> (acetylene)     | 11.40                  | Standard gas experiment | -    |
| 27.99      | CO (carbon monoxide)                          | 14.01                  | Standard gas experiment | -    |
| 28.03      | C <sub>2</sub> H <sub>4</sub> (ethylene)      | 10.51                  | Standard gas experiment | -    |
| 29.04      | C <sub>2</sub> H <sub>5</sub> (ethyl radical) | 8.12                   | 5.37 (11.5 eV)          | 3    |
| 30.01      | CH <sub>2</sub> O (formaldehyde)              | 10.88                  | 38 (13 eV)              | est  |
| 30.05      | C <sub>2</sub> H <sub>6</sub> (ethane)        | 11.52                  | Standard gas experiment | -    |
| 31.99      | O <sub>2</sub> (oxygen)                       | 12.07                  | Standard gas experiment | -    |
| 42.04      | CH <sub>2</sub> CO (ketene)                   | 9.62                   | 13 (11.5 eV)            | est  |
| 42.05      | C <sub>3</sub> H <sub>6</sub> (propene)       | 9.73                   | 13.35 (11.5 eV)         | 4    |
| 44.01      | CO <sub>2</sub> (carbon dioxide)              | 13.78                  | Standard gas experiment | -    |
| 44.10      | C <sub>3</sub> H <sub>8</sub> (propane)       | 10.94                  | 11.46 (11.5 eV)         | 5    |

**Table S2.** Estimates for the catalyst descriptors of Li/MgO catalyst for OCM.

|                | Catalyst descriptor                                          | Unit                | Value                    |
|----------------|--------------------------------------------------------------|---------------------|--------------------------|
| D <sub>1</sub> | Chemisorption enthalpy of O <sub>2</sub>                     | kJ/mol              | 111                      |
| D <sub>2</sub> | Reaction enthalpy of hydrogen abstraction of CH <sub>4</sub> | kJ/mol              | 61                       |
| D <sub>3</sub> | Chemisorption enthalpy of CO <sub>2</sub>                    | kJ/mol              | 87                       |
| D <sub>4</sub> | Chemisorption enthalpy of H <sub>2</sub> O                   | kJ/mol              | 54                       |
| D <sub>5</sub> | Density of active sites                                      | mol/cm <sup>2</sup> | 2.25 × 10 <sup>-10</sup> |

### *X-ray diffraction (XRD) spectrum*

The XRD patterns did not detect any oxidation phase of Li, aligning with the findings of Qian et al.<sup>6</sup> This indicates that the calculated 5.6% Li loading primarily contributes to the structure modification of the MgO catalyst, consistent with previous conclusions<sup>7-10</sup> and the modeling hypothesis presented in this paper.

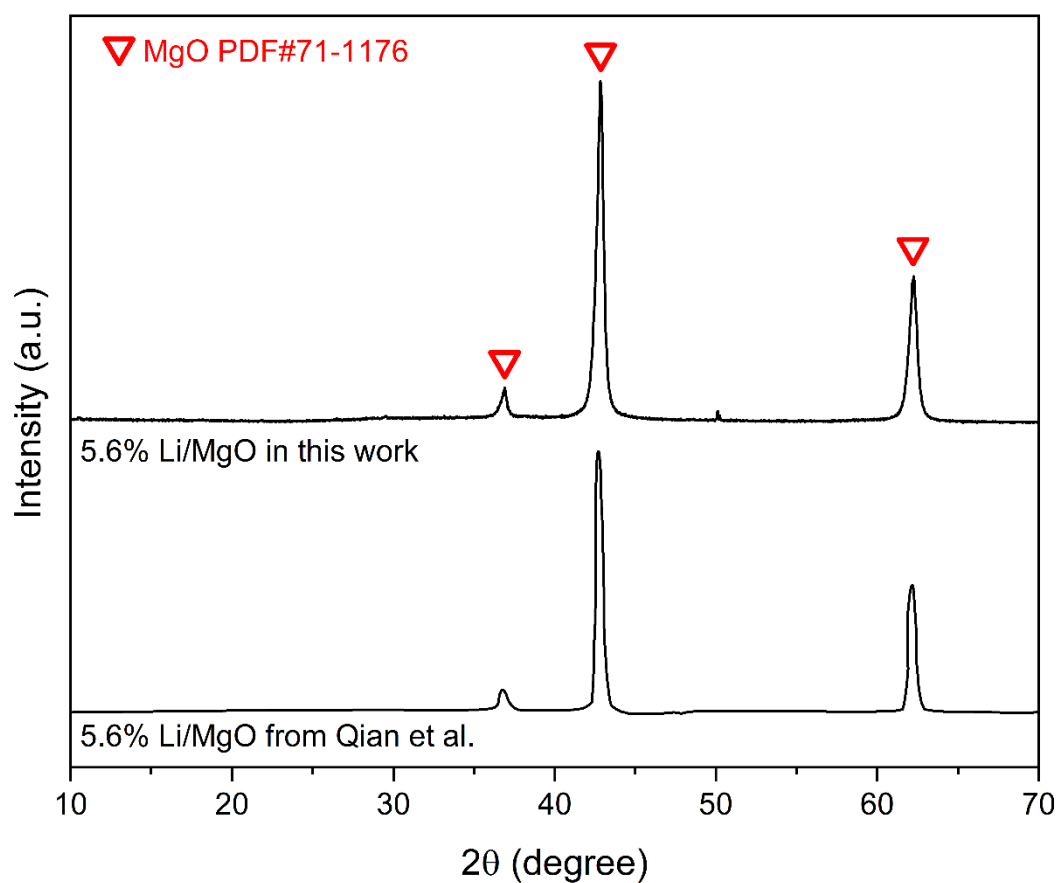

**Figure S1.** XRD patterns of Li-MgO catalysts with 5.6% calculated Li loadings.

## References

1. C. A. Taatjes, D. L. Osborn, T. M. Selby, G. Meloni, H. Fan and S. T. Pratt, *J. Phys. Chem. A*, 2008, **112**, 9336-9343.
2. P. M. Dehmer and D. M. P. Holland, *J. Chem. Phys.*, 1991, **94**, 3302-3314.
3. B. Gans, G. A. Garcia, S. Boye-Peronne, J.-C. Loison, S. Douin, F. Gaie-Levrel and D. Gauyacq, *J. Phys. Chem. A*, 2011, **115**, 5387-5396.
4. T. A. Cool, K. Nakajima, T. A. Mostefaoui, F. Qi, A. McIlroy, P. R. Westmoreland, M. E. Law, L. Poisson, D. S. Peterka and M. Ahmed, *The Journal of Chemical Physics*, 2003, **119**, 8356-8365.
5. T. A. Cool, A. McIlroy, F. Qi, P. R. Westmoreland, L. Poisson, D. S. Peterka and M. Ahmed, *Rev. Sci. Instrum.*, 2005, **76**, 094102.
6. K. Qian, R. You, Y. Guan, W. Wen, Y. Tian, Y. Pan and W. Huang, *ACS Catalysis*, 2020, **10**, 15142-15148.
7. K. Kwapien, J. Paier, J. Sauer, M. Geske, U. Zavyalova, R. Horn, P. Schwach, A. Trunschke and R. Schlögl, *Angewandte Chemie International Edition*, 2014, **53**, 8774-8778.
8. G. H. Jaffari, A. Tahir, M. Bah, A. Ali, A. S. Bhatti and S. I. Shah, *The Journal of Physical Chemistry C*, 2015, **119**, 28182-28189.
9. N. Richter, F. Stavale, S. V. Levchenko, N. Nilius, H.-J. Freund and M. Scheffler, *Physical Review B*, 2015, **91**, 195305.
10. L. Luo, Y. Jin, H. Pan, X. Zheng, L. Wu, R. You and W. Huang, *Journal of Catalysis*, 2017, **346**, 57-61.
