# Supplementary material for: Mechanistic insights into the oxidative coupling of methane over a Li/MgO catalyst: an experimental and microkinetic modeling study
Source: Royal Society of Chemistry journal article supplement (doi:10.1039/d4cy01132e), 2024-01-01
Supplement: d4cy01132e2.pdf [file d4cy01132e2.pdf]

ELEMENTS

O H C N AR

END

SPECIES

H2

H

O

O2

OH

H2O

HO2

H2O2

C

CH

CH2

CH2(S)

CH3

CH4

CO

CO2

HCO

CH2O

CH2OH

CH3O

CH3OH

C2H

C2H2

C2H3

C2H4

C2H5

C2H6

HCCO

CH2CO

HCCOH

N2

AR

C3H7

C3H8

CH2CHO

CH3CHO

C3H4

C3H3

C3H5

C3H6  
 C3H6OOH  
 OC3H5OOH  
 C4H10  
 PC4H9  
 SC4H9  
 C4H8  
 CHCHO  
 SC4H9O2  
 CH3CO  
 END

REACTIONS

|                                                                              |           |          |             |
|------------------------------------------------------------------------------|-----------|----------|-------------|
| 2O+M<=>O2+M                                                                  | 1.200E+17 | -1.000   | .00         |
| H2/ 2.40/ H2O/15.40/ CH4/ 2.00/ CO/ 1.75/ CO2/ 3.60/ C2H6/ 3.00/ AR/ .83/    |           |          |             |
| O+H+M<=>OH+M                                                                 |           |          | 5.000E+17 - |
| 1.000                                                                        | .00       |          |             |
| H2/2.00/ H2O/6.00/ CH4/2.00/ CO/1.50/ CO2/2.00/ C2H6/3.00/ AR/ .70/          |           |          |             |
| O+H2<=>H+OH                                                                  | 3.870E+04 | 2.700    | 6260.00     |
| O+HO2<=>OH+O2                                                                | 2.000E+13 | .000     | .00         |
| O+H2O2<=>OH+HO2                                                              | 9.630E+06 | 2.000    | 4000.00     |
| O+CH<=>H+CO                                                                  | 5.700E+13 | .000     | .00         |
| O+CH2<=>H+HCO                                                                | 8.000E+13 | .000     | .00         |
| O+CH2(S)<=>H2+CO                                                             | 1.500E+13 | .000     | .00         |
| O+CH2(S)<=>H+HCO                                                             | 1.500E+13 | .000     | .00         |
| O+CH3<=>H+CH2O                                                               | 5.060E+13 | .000     | .00         |
| O+CH4<=>OH+CH3                                                               | 1.020E+09 | 1.500    | 8600.00     |
| O+CO(+M)<=>CO2(+M)                                                           | 1.800E+10 | .000     | 2385.00     |
| LOW/ 6.020E+14                                                               | .000      | 3000.00/ |             |
| H2/2.00/ O2/6.00/ H2O/6.00/ CH4/2.00/ CO/1.50/ CO2/3.50/ C2H6/3.00/ AR/ .50/ |           |          |             |
| O+HCO<=>OH+CO                                                                | 3.000E+13 | .000     | .00         |
| O+HCO<=>H+CO2                                                                | 3.000E+13 | .000     | .00         |
| O+CH2O<=>OH+HCO                                                              | 3.900E+13 | .000     | 3540.00     |
| O+CH2OH<=>OH+CH2O                                                            | 1.000E+13 | .000     | .00         |
| O+CH3O<=>OH+CH2O                                                             | 1.000E+13 | .000     | .00         |
| O+CH3OH<=>OH+CH2OH                                                           | 3.880E+05 | 2.500    | 3100.00     |
| O+CH3OH<=>OH+CH3O                                                            | 1.300E+05 | 2.500    | 5000.00     |
| O+C2H<=>CH+CO                                                                | 5.000E+13 | .000     | .00         |
| O+C2H2<=>H+HCCO                                                              | 1.350E+07 | 2.000    | 1900.00     |
| O+C2H2<=>OH+C2H                                                              | 4.600E+19 | -1.410   | 28950.00    |
| O+C2H2<=>CO+CH2                                                              | 6.940E+06 | 2.000    | 1900.00     |
| O+C2H3<=>H+CH2CO                                                             | 3.000E+13 | .000     | .00         |
| O+C2H4<=>CH3+HCO                                                             | 1.250E+07 | 1.830    | 220.00      |
| O+C2H5<=>CH3+CH2O                                                            | 2.240E+13 | .000     | .00         |

|                                                                     |           |        |                   |
|---------------------------------------------------------------------|-----------|--------|-------------------|
| O+C2H6<=>OH+C2H5                                                    | 8.980E+07 | 1.920  | 5690.00           |
| O+HCCO<=>H+2CO                                                      | 1.000E+14 | .000   | .00               |
| O+CH2CO<=>OH+HCCO                                                   | 1.000E+13 | .000   | 8000.00           |
| O+CH2CO<=>CH2+CO2                                                   | 1.750E+12 | .000   | 1350.00           |
| O2+CO<=>O+CO2                                                       | 2.500E+12 | .000   | 47800.00          |
| O2+CH2O<=>HO2+HCO                                                   | 1.000E+14 | .000   | 40000.00          |
| H+O2+M<=>HO2+M                                                      | 2.800E+18 | -.860  | .00               |
| O2/ .00/ H2O/ .00/ CO/ .75/ CO2/1.50/ C2H6/1.50/ N2/ .00/ AR/ .00/  |           |        |                   |
| H+2O2<=>HO2+O2                                                      | 2.080E+19 | -1.240 | .00               |
| H+O2+H2O<=>HO2+H2O                                                  | 11.26E+18 | -.760  | .00               |
| H+O2+N2<=>HO2+N2                                                    | 2.600E+19 | -1.240 | .00               |
| H+O2+AR<=>HO2+AR                                                    | 7.000E+17 | -.800  | .00               |
| H+O2<=>O+OH                                                         | 2.650E+16 | -.6707 | 17041.00          |
| 2H+M<=>H2+M                                                         | 1.000E+18 | -1.000 | .00               |
| H2/ .00/ H2O/ .00/ CH4/2.00/ CO2/ .00/ C2H6/3.00/ AR/ .63/          |           |        |                   |
| 2H+H2<=>2H2                                                         | 9.000E+16 | -.600  | .00               |
| 2H+H2O<=>H2+H2O                                                     | 6.000E+19 | -1.250 | .00               |
| 2H+CO2<=>H2+CO2                                                     | 5.500E+20 | -2.000 | .00               |
| H+OH+M<=>H2O+M                                                      | 2.200E+22 | -2.000 | .00               |
| H2/ .73/ H2O/3.65/ CH4/2.00/ C2H6/3.00/ AR/ .38/                    |           |        |                   |
| H+HO2<=>O+H2O                                                       | 3.970E+12 | .000   | 671.00            |
| H+HO2<=>O2+H2                                                       | 4.480E+13 | .000   | 1068.00           |
| H+HO2<=>2OH                                                         | 0.840E+14 | .000   | 635.00            |
| H+H2O2<=>HO2+H2                                                     | 1.210E+07 | 2.000  | 5200.00           |
| H+H2O2<=>OH+H2O                                                     | 1.000E+13 | .000   | 3600.00           |
| H+CH<=>C+H2                                                         | 1.650E+14 | .000   | .00               |
| H+CH2(+M)<=>CH3(+M)                                                 | 6.000E+14 | .000   | .00               |
| LOW /                                                               | 1.040E+26 | -2.760 | 1600.00/          |
| TROE/                                                               | .5620     | 91.00  | 5836.00 8552.00/  |
| H2/2.00/ H2O/6.00/ CH4/2.00/ CO/1.50/ CO2/2.00/ C2H6/3.00/ AR/ .70/ |           |        |                   |
| H+CH2(S)<=>CH+H2                                                    | 3.000E+13 | .000   | .00               |
| H+CH3(+M)<=>CH4(+M)                                                 | 13.90E+15 | -.534  | 536.00            |
| LOW /                                                               | 2.620E+33 | -4.760 | 2440.00/          |
| TROE/                                                               | .7830     | 74.00  | 2941.00 6964.00 / |
| H2/2.00/ H2O/6.00/ CH4/3.00/ CO/1.50/ CO2/2.00/ C2H6/3.00/ AR/ .70/ |           |        |                   |
| H+CH4<=>CH3+H2                                                      | 6.600E+08 | 1.620  | 10840.00          |
| H+HCO(+M)<=>CH2O(+M)                                                | 1.090E+12 | .480   | -260.00           |
| LOW /                                                               | 2.470E+24 | -2.570 | 425.00/           |
| TROE/                                                               | .7824     | 271.00 | 2755.00 6570.00 / |
| H2/2.00/ H2O/6.00/ CH4/2.00/ CO/1.50/ CO2/2.00/ C2H6/3.00/ AR/ .70/ |           |        |                   |
| H+HCO<=>H2+CO                                                       | 7.340E+13 | .000   | .00               |
| H+CH2O(+M)<=>CH2OH(+M)                                              | 5.400E+11 | .454   | 3600.00           |
| LOW /                                                               | 1.270E+32 | -4.820 | 6530.00/          |
| TROE/                                                               | .7187     | 103.00 | 1291.00 4160.00 / |

H2/2.00/ H2O/6.00/ CH4/2.00/ CO/1.50/ CO2/2.00/ C2H6/3.00/  
 H+CH2O(+M)<=>CH3O(+M) 5.400E+11 .454 2600.00  
     LOW / 2.200E+30 -4.800 5560.00/  
     TROE/ .7580 94.00 1555.00 4200.00 /  
 H2/2.00/ H2O/6.00/ CH4/2.00/ CO/1.50/ CO2/2.00/ C2H6/3.00/  
 H+CH2O<=>HCO+H2 5.740E+07 1.900 2742.00  
 H+CH2OH(+M)<=>CH3OH(+M) 1.055E+12 .500 86.00  
     LOW / 4.360E+31 -4.650 5080.00/  
     TROE/ .600 100.00 90000.0 10000.0 /  
 H2/2.00/ H2O/6.00/ CH4/2.00/ CO/1.50/ CO2/2.00/ C2H6/3.00/  
 H+CH2OH<=>H2+CH2O 2.000E+13 .000 .00  
 H+CH2OH<=>OH+CH3 1.650E+11 .650 -284.00  
 H+CH2OH<=>CH2(S)+H2O 3.280E+13 -.090 610.00  
 H+CH3O(+M)<=>CH3OH(+M) 2.430E+12 .515 50.00  
     LOW / 4.660E+41 -7.440 14080.0/  
     TROE/ .700 100.00 90000.0 10000.00 /  
 H2/2.00/ H2O/6.00/ CH4/2.00/ CO/1.50/ CO2/2.00/ C2H6/3.00/  
 H+CH3O<=>H+CH2OH 4.150E+07 1.630 1924.00  
 H+CH3O<=>H2+CH2O 2.000E+13 .000 .00  
 H+CH3O<=>OH+CH3 1.500E+12 .500 -110.00  
 H+CH3O<=>CH2(S)+H2O 2.620E+14 -.230 1070.00  
 H+CH3OH<=>CH2OH+H2 1.700E+07 2.100 4870.00  
 H+CH3OH<=>CH3O+H2 4.200E+06 2.100 4870.00  
 H+C2H(+M)<=>C2H2(+M) 1.000E+17 -1.000 .00  
     LOW / 3.750E+33 -4.800 1900.00/  
     TROE/ .6464 132.00 1315.00 5566.00 /  
 H2/2.00/ H2O/6.00/ CH4/2.00/ CO/1.50/ CO2/2.00/ C2H6/3.00/ AR/ .70/  
 H+C2H2(+M)<=>C2H3(+M) 5.600E+12 .000 2400.00  
     LOW / 3.800E+40 -7.270 7220.00/  
     TROE/ .7507 98.50 1302.00 4167.00 /  
 H2/2.00/ H2O/6.00/ CH4/2.00/ CO/1.50/ CO2/2.00/ C2H6/3.00/ AR/ .70/  
 H+C2H3(+M)<=>C2H4(+M) 6.080E+12 .270 280.00  
     LOW / 1.400E+30 -3.860 3320.00/  
     TROE/ .7820 207.50 2663.00 6095.00 /  
 H2/2.00/ H2O/6.00/ CH4/2.00/ CO/1.50/ CO2/2.00/ C2H6/3.00/ AR/ .70/  
 H+C2H3<=>H2+C2H2 3.000E+13 .000 .00  
 H+C2H4(+M)<=>C2H5(+M) 0.540E+12 .454 1820.00  
     LOW / 0.600E+42 -7.620 6970.00/  
     TROE/ .9753 210.00 984.00 4374.00 /  
 H2/2.00/ H2O/6.00/ CH4/2.00/ CO/1.50/ CO2/2.00/ C2H6/3.00/ AR/ .70/  
 H+C2H4<=>C2H3+H2 1.325E+06 2.530 12240.00  
 H+C2H5(+M)<=>C2H6(+M) 5.210E+17 -.990 1580.00  
     LOW / 1.990E+41 -7.080 6685.00/  
     TROE/ .8422 125.00 2219.00 6882.00 /

H2/2.00/ H2O/6.00/ CH4/2.00/ CO/1.50/ CO2/2.00/ C2H6/3.00/ AR/ .70/

|                      |           |        |                    |
|----------------------|-----------|--------|--------------------|
| H+C2H5<=>H2+C2H4     | 2.000E+12 | .000   | .00                |
| H+C2H6<=>C2H5+H2     | 1.150E+08 | 1.900  | 7530.00            |
| H+HCCO<=>CH2(S)+CO   | 1.000E+14 | .000   | .00                |
| H+CH2CO<=>HCCO+H2    | 5.000E+13 | .000   | 8000.00            |
| H+CH2CO<=>CH3+CO     | 1.130E+13 | 0.500  | 3428.00            |
| H+HCCOH<=>H+CH2CO    | 1.000E+13 | .000   | .00                |
| H2+CO(+M)<=>CH2O(+M) | 4.300E+07 | 1.500  | 79600.00           |
| LOW /                | 5.070E+27 | -3.420 | 84350.00/          |
| TROE/                | .9320     | 197.00 | 1540.00 10300.00 / |

H2/2.00/ H2O/6.00/ CH4/2.00/ CO/1.50/ CO2/2.00/ C2H6/3.00/ AR/ .70/

|                    |           |       |                   |
|--------------------|-----------|-------|-------------------|
| OH+H2<=>H+H2O      | 2.160E+08 | 1.510 | 3430.00           |
| 2OH(+M)<=>H2O2(+M) | 7.400E+13 | -.370 | .00               |
| LOW /              | 2.300E+18 | -.900 | -1700.00/         |
| TROE/              | .7346     | 94.00 | 1756.00 5182.00 / |

H2/2.00/ H2O/6.00/ CH4/2.00/ CO/1.50/ CO2/2.00/ C2H6/3.00/ AR/ .70/

|                        |           |        |                  |
|------------------------|-----------|--------|------------------|
| 2OH<=>O+H2O            | 3.570E+04 | 2.400  | -2110.00         |
| OH+HO2<=>O2+H2O        | 1.450E+13 | .000   | -500.00          |
| DUPLICATE              |           |        |                  |
| OH+H2O2<=>HO2+H2O      | 2.000E+12 | .000   | 427.00           |
| DUPLICATE              |           |        |                  |
| OH+H2O2<=>HO2+H2O      | 1.700E+18 | .000   | 29410.00         |
| DUPLICATE              |           |        |                  |
| OH+C<=>H+CO            | 5.000E+13 | .000   | .00              |
| OH+CH<=>H+HCO          | 3.000E+13 | .000   | .00              |
| OH+CH2<=>H+CH2O        | 2.000E+13 | .000   | .00              |
| OH+CH2<=>CH+H2O        | 1.130E+07 | 2.000  | 3000.00          |
| OH+CH2(S)<=>H+CH2O     | 3.000E+13 | .000   | .00              |
| OH+CH3(+M)<=>CH3OH(+M) | 2.790E+18 | -1.430 | 1330.00          |
| LOW /                  | 4.000E+36 | -5.920 | 3140.00/         |
| TROE/                  | .4120     | 195.0  | 5900.00 6394.00/ |

H2/2.00/ H2O/6.00/ CH4/2.00/ CO/1.50/ CO2/2.00/ C2H6/3.00/

|                      |           |        |          |
|----------------------|-----------|--------|----------|
| OH+CH3<=>CH2+H2O     | 5.600E+07 | 1.600  | 5420.00  |
| OH+CH3<=>CH2(S)+H2O  | 6.440E+17 | -1.340 | 1417.00  |
| OH+CH4<=>CH3+H2O     | 1.000E+08 | 1.600  | 3120.00  |
| OH+CO<=>H+CO2        | 4.760E+07 | 1.228  | 70.00    |
| OH+HCO<=>H2O+CO      | 5.000E+13 | .000   | .00      |
| OH+CH2O<=>HCO+H2O    | 3.430E+09 | 1.180  | -447.00  |
| OH+CH2OH<=>H2O+CH2O  | 5.000E+12 | .000   | .00      |
| OH+CH3O<=>H2O+CH2O   | 5.000E+12 | .000   | .00      |
| OH+CH3OH<=>CH2OH+H2O | 1.440E+06 | 2.000  | -840.00  |
| OH+CH3OH<=>CH3O+H2O  | 6.300E+06 | 2.000  | 1500.00  |
| OH+C2H<=>H+HCCO      | 2.000E+13 | .000   | .00      |
| OH+C2H2<=>H+CH2CO    | 2.180E-04 | 4.500  | -1000.00 |

|                                                                     |           |        |                   |
|---------------------------------------------------------------------|-----------|--------|-------------------|
| OH+C2H2<=>H+HCCOH                                                   | 5.040E+05 | 2.300  | 13500.00          |
| OH+C2H2<=>C2H+H2O                                                   | 3.370E+07 | 2.000  | 14000.00          |
| OH+C2H2<=>CH3+CO                                                    | 4.830E-04 | 4.000  | -2000.00          |
| OH+C2H3<=>H2O+C2H2                                                  | 5.000E+12 | .000   | .00               |
| OH+C2H4<=>C2H3+H2O                                                  | 3.600E+06 | 2.000  | 2500.00           |
| OH+C2H6<=>C2H5+H2O                                                  | 3.540E+06 | 2.120  | 870.00            |
| OH+CH2CO<=>HCCO+H2O                                                 | 7.500E+12 | .000   | 2000.00           |
| 2HO2<=>O2+H2O2                                                      | 1.300E+11 | .000   | -1630.00          |
| DUPLICATE                                                           |           |        |                   |
| 2HO2<=>O2+H2O2                                                      | 4.200E+14 | .000   | 12000.00          |
| DUPLICATE                                                           |           |        |                   |
| HO2+CH2<=>OH+CH2O                                                   | 2.000E+13 | .000   | .00               |
| HO2+CH3<=>O2+CH4                                                    | 1.000E+12 | .000   | .00               |
| HO2+CH3<=>OH+CH3O                                                   | 3.780E+13 | .000   | .00               |
| HO2+CO<=>OH+CO2                                                     | 1.500E+14 | .000   | 23600.00          |
| HO2+CH2O<=>HCO+H2O2                                                 | 5.600E+06 | 2.000  | 12000.00          |
| C+O2<=>O+CO                                                         | 5.800E+13 | .000   | 576.00            |
| C+CH2<=>H+C2H                                                       | 5.000E+13 | .000   | .00               |
| C+CH3<=>H+C2H2                                                      | 5.000E+13 | .000   | .00               |
| CH+O2<=>O+HCO                                                       | 6.710E+13 | .000   | .00               |
| CH+H2<=>H+CH2                                                       | 1.080E+14 | .000   | 3110.00           |
| CH+H2O<=>H+CH2O                                                     | 5.710E+12 | .000   | -755.00           |
| CH+CH2<=>H+C2H2                                                     | 4.000E+13 | .000   | .00               |
| CH+CH3<=>H+C2H3                                                     | 3.000E+13 | .000   | .00               |
| CH+CH4<=>H+C2H4                                                     | 6.000E+13 | .000   | .00               |
| CH+CO(+M)<=>HCCO(+M)                                                | 5.000E+13 | .000   | .00               |
| LOW /                                                               | 2.690E+28 | -3.740 | 1936.00/          |
| TROE/                                                               | .5757     | 237.00 | 1652.00 5069.00 / |
| H2/2.00/ H2O/6.00/ CH4/2.00/ CO/1.50/ CO2/2.00/ C2H6/3.00/ AR/ .70/ |           |        |                   |
| CH+CO2<=>HCO+CO                                                     | 1.900E+14 | .000   | 15792.00          |
| CH+CH2O<=>H+CH2CO                                                   | 9.460E+13 | .000   | -515.00           |
| CH+HCCO<=>CO+C2H2                                                   | 5.000E+13 | .000   | .00               |
| CH2+O2=>OH+H+CO                                                     | 5.000E+12 | .000   | 1500.00           |
| CH2+H2<=>H+CH3                                                      | 5.000E+05 | 2.000  | 7230.00           |
| 2CH2<=>H2+C2H2                                                      | 1.600E+15 | .000   | 11944.00          |
| CH2+CH3<=>H+C2H4                                                    | 4.000E+13 | .000   | .00               |
| CH2+CH4<=>2CH3                                                      | 2.460E+06 | 2.000  | 8270.00           |
| CH2+CO(+M)<=>CH2CO(+M)                                              | 8.100E+11 | .500   | 4510.00           |
| LOW /                                                               | 2.690E+33 | -5.110 | 7095.00/          |
| TROE/                                                               | .5907     | 275.00 | 1226.00 5185.00 / |
| H2/2.00/ H2O/6.00/ CH4/2.00/ CO/1.50/ CO2/2.00/ C2H6/3.00/ AR/ .70/ |           |        |                   |
| CH2+HCCO<=>C2H3+CO                                                  | 3.000E+13 | .000   | .00               |
| CH2(S)+N2<=>CH2+N2                                                  | 1.500E+13 | .000   | 600.00            |
| CH2(S)+AR<=>CH2+AR                                                  | 9.000E+12 | .000   | 600.00            |

|                                                                     |           |        |                   |
|---------------------------------------------------------------------|-----------|--------|-------------------|
| CH2(S)+O2<=>H+OH+CO                                                 | 2.800E+13 | .000   | .00               |
| CH2(S)+O2<=>CO+H2O                                                  | 1.200E+13 | .000   | .00               |
| CH2(S)+H2<=>CH3+H                                                   | 7.000E+13 | .000   | .00               |
| CH2(S)+H2O(+M)<=>CH3OH(+M)                                          | 4.820E+17 | -1.160 | 1145.00           |
| LOW /                                                               | 1.880E+38 | -6.360 | 5040.00/          |
| TROE/                                                               | .6027     | 208.00 | 3922.00 10180.0 / |
| H2/2.00/ H2O/6.00/ CH4/2.00/ CO/1.50/ CO2/2.00/ C2H6/3.00/          |           |        |                   |
| CH2(S)+H2O<=>CH2+H2O                                                | 3.000E+13 | .000   | .00               |
| CH2(S)+CH3<=>H+C2H4                                                 | 1.200E+13 | .000   | -570.00           |
| CH2(S)+CH4<=>2CH3                                                   | 1.600E+13 | .000   | -570.00           |
| CH2(S)+CO<=>CH2+CO                                                  | 9.000E+12 | .000   | .00               |
| CH2(S)+CO2<=>CH2+CO2                                                | 7.000E+12 | .000   | .00               |
| CH2(S)+CO2<=>CO+CH2O                                                | 1.400E+13 | .000   | .00               |
| CH2(S)+C2H6<=>CH3+C2H5                                              | 4.000E+13 | .000   | -550.00           |
| CH3+O2<=>O+CH3O                                                     | 3.560E+13 | .000   | 30480.00          |
| CH3+O2<=>OH+CH2O                                                    | 2.310E+12 | .000   | 20315.00          |
| CH3+H2O2<=>HO2+CH4                                                  | 2.450E+04 | 2.470  | 5180.00           |
| 2CH3(+M)<=>C2H6(+M)                                                 | 6.770E+18 | -1.180 | 654.00            |
| LOW /                                                               | 3.400E+41 | -7.030 | 2762.00/          |
| TROE/                                                               | .6190     | 73.20  | 1180.00 9999.00 / |
| H2/2.00/ H2O/6.00/ CH4/2.00/ CO/1.50/ CO2/2.00/ C2H6/3.00/ AR/ .70/ |           |        |                   |
| 2CH3<=>H+C2H5                                                       | 6.840E+12 | .100   | 10600.00          |
| CH3+HCO<=>CH4+CO                                                    | 2.648E+13 | .000   | .00               |
| CH3+CH2O<=>HCO+CH4                                                  | 3.320E+03 | 2.810  | 5860.00           |
| CH3+CH3OH<=>CH2OH+CH4                                               | 3.000E+07 | 1.500  | 9940.00           |
| CH3+CH3OH<=>CH3O+CH4                                                | 1.000E+07 | 1.500  | 9940.00           |
| CH3+C2H4<=>C2H3+CH4                                                 | 2.270E+05 | 2.000  | 9200.00           |
| CH3+C2H6<=>C2H5+CH4                                                 | 6.140E+06 | 1.740  | 10450.00          |
| HCO+H2O<=>H+CO+H2O                                                  | 1.500E+18 | -1.000 | 17000.00          |
| HCO+M<=>H+CO+M                                                      | 1.870E+17 | -1.000 | 17000.00          |
| H2/2.00/ H2O/ .00/ CH4/2.00/ CO/1.50/ CO2/2.00/ C2H6/3.00/          |           |        |                   |
| HCO+O2<=>HO2+CO                                                     | 13.45E+12 | .000   | 400.00            |
| CH2OH+O2<=>HO2+CH2O                                                 | 1.800E+13 | .000   | 900.00            |
| CH3O+O2<=>HO2+CH2O                                                  | 4.280E-13 | 7.600  | -3530.00          |
| C2H+O2<=>HCO+CO                                                     | 1.000E+13 | .000   | -755.00           |
| C2H+H2<=>H+C2H2                                                     | 5.680E+10 | 0.900  | 1993.00           |
| C2H3+O2<=>HCO+CH2O                                                  | 4.580E+16 | -1.390 | 1015.00           |
| C2H4(+M)<=>H2+C2H2(+M)                                              | 8.000E+12 | .440   | 86770.00          |
| LOW /                                                               | 1.580E+51 | -9.300 | 97800.00/         |
| TROE/                                                               | .7345     | 180.00 | 1035.00 5417.00 / |
| H2/2.00/ H2O/6.00/ CH4/2.00/ CO/1.50/ CO2/2.00/ C2H6/3.00/ AR/ .70/ |           |        |                   |
| C2H5+O2<=>HO2+C2H4                                                  | 8.400E+11 | .000   | 3875.00           |
| HCCO+O2<=>OH+2CO                                                    | 3.200E+12 | .000   | 854.00            |
| 2HCCO<=>2CO+C2H2                                                    | 1.000E+13 | .000   | .00               |

|                                                                     |           |       |          |
|---------------------------------------------------------------------|-----------|-------|----------|
| O+CH3=>H+H2+CO                                                      | 3.370E+13 | .000  | .00      |
| O+C2H4<=>H+CH2CHO                                                   | 6.700E+06 | 1.830 | 220.00   |
| O+C2H5<=>H+CH3CHO                                                   | 1.096E+14 | .000  | .00      |
| OH+HO2<=>O2+H2O                                                     | 0.500E+16 | .000  | 17330.00 |
| DUPLICATE                                                           |           |       |          |
| OH+CH3=>H2+CH2O                                                     | 8.000E+09 | .500  | -1755.00 |
| CH+H2(+M)<=>CH3(+M)                                                 | 1.970E+12 | .430  | -370.00  |
| LOW/ 4.820E+25 -2.80 590.0 /                                        |           |       |          |
| TROE/ .578 122.0 2535.0 9365.0 /                                    |           |       |          |
| H2/2.00/ H2O/6.00/ CH4/2.00/ CO/1.50/ CO2/2.00/ C2H6/3.00/ AR/ .70/ |           |       |          |
| CH2+O2=>2H+CO2                                                      | 5.800E+12 | .000  | 1500.00  |
| CH2+O2<=>O+CH2O                                                     | 2.400E+12 | .000  | 1500.00  |
| CH2+CH2=>2H+C2H2                                                    | 2.000E+14 | .000  | 10989.00 |
| CH2(S)+H2O=>H2+CH2O                                                 | 6.820E+10 | .250  | -935.00  |
| C2H3+O2<=>O+CH2CHO                                                  | 3.030E+11 | .290  | 11.00    |
| C2H3+O2<=>HO2+C2H2                                                  | 1.337E+06 | 1.610 | -384.00  |
| O+CH3CHO<=>OH+CH2CHO                                                | 2.920E+12 | .000  | 1808.00  |
| O+CH3CHO=>OH+CH3+CO                                                 | 2.920E+12 | .000  | 1808.00  |
| O2+CH3CHO=>HO2+CH3+CO                                               | 3.010E+13 | .000  | 39150.00 |
| H+CH3CHO<=>CH2CHO+H2                                                | 2.050E+09 | 1.160 | 2405.00  |
| H+CH3CHO=>CH3+H2+CO                                                 | 2.050E+09 | 1.160 | 2405.00  |
| OH+CH3CHO=>CH3+H2O+CO                                               | 2.343E+10 | 0.730 | -1113.00 |
| HO2+CH3CHO=>CH3+H2O2+CO                                             | 3.010E+12 | .000  | 11923.00 |
| CH3+CH3CHO=>CH3+CH4+CO                                              | 2.720E+06 | 1.770 | 5920.00  |
| H+CH2CO(+M)<=>CH2CHO(+M)                                            | 4.865E+11 | 0.422 | -1755.00 |
| LOW/ 1.012E+42 -8.63 3854.0 /                                       |           |       |          |
| TROE/ 0.465 201.0 1773.0 5333.0 /                                   |           |       |          |
| H2/2.00/ H2O/6.00/ CH4/2.00/ CO/1.50/ CO2/2.00/ C2H6/3.00/ AR/ .70/ |           |       |          |
| O+CH2CHO=>H+CH2+CO2                                                 | 1.500E+14 | .000  | .00      |
| O2+CH2CHO=>OH+CO+CH2O                                               | 1.810E+10 | .000  | .00      |
| O2+CH2CHO=>OH+2HCO                                                  | 2.350E+10 | .000  | .00      |
| H+CH2CHO<=>CH3+HCO                                                  | 2.200E+13 | .000  | .00      |
| H+CH2CHO<=>CH2CO+H2                                                 | 1.100E+13 | .000  | .00      |
| OH+CH2CHO<=>H2O+CH2CO                                               | 1.200E+13 | .000  | .00      |
| OH+CH2CHO<=>HCO+CH2OH                                               | 3.010E+13 | .000  | .00      |
| O+C3H8<=>OH+C3H7                                                    | 1.930E+05 | 2.680 | 3716.00  |
| H+C3H8<=>C3H7+H2                                                    | 1.320E+06 | 2.540 | 6756.00  |
| OH+C3H8<=>C3H7+H2O                                                  | 3.160E+07 | 1.800 | 934.00   |
| C3H7+H2O2<=>HO2+C3H8                                                | 3.780E+02 | 2.720 | 1500.00  |
| CH3+C3H8<=>C3H7+CH4                                                 | 0.903E+00 | 3.650 | 7154.00  |
| CH3+C2H4(+M)<=>C3H7(+M)                                             | 2.550E+06 | 1.600 | 5700.00  |
| LOW/ 3.00E+63 -14.6 18170. /                                        |           |       |          |
| TROE/ .1894 277.0 8748.0 7891.0 /                                   |           |       |          |
| H2/2.00/ H2O/6.00/ CH4/2.00/ CO/1.50/ CO2/2.00/ C2H6/3.00/ AR/ .70/ |           |       |          |



O+C3H7<=>C2H5+CH2O  
9.640E+13 .000 .00  
H+C3H7(+M)<=>C3H8(+M)  
3.613E+13 .000 .00  
LOW/ 4.420E+61 -13.545 11357.0/  
TROE/ .315 369.0 3285.0 6667.0 /  
H2/2.00/ H2O/6.00/ CH4/2.00/ CO/1.50/ CO2/2.00/ C2H6/3.00/ AR/ .70/  
H+C3H7<=>CH3+C2H5 4.060E+06 2.190 890.00  
OH+C3H7<=>C2H5+CH2OH 2.410E+13 .000 .00  
HO2+C3H7<=>O2+C3H8 2.550E+10 0.255 -943.00  
HO2+C3H7=>OH+C2H5+CH2O 2.410E+13 .000 .00  
CH3+C3H7<=>2C2H5 1.927E+13 -0.320 .00  
C3H4+O<=>C2H4+CO 2.000e+07 1.800 1000.00  
CH3+C2H2<=>C3H4+H 2.560e+09 1.100 13643.88  
C3H4+O<=>HCCO+CH3 7.300e+12 0.000 2250.00  
C3H3+H(+M)<=>C3H4(+M) 3.000e+13 0.000 0.00  
LOW / 9.000e+15 1.000 0.00 /  
TROE/ 0.5 1e+30 1e-30 /  
C3H3+HO2<=>C3H4+O2 2.500e+12 0.000 0.00  
C3H4+OH<=>C3H3+H2O 5.300e+06 2.000 2000.00  
C3H3+O2<=>CH2CO+HCO 3.000e+10 0.000 2868.07  
C3H4+H(+M)<=>C3H5(+M) 4.000e+13 0.000 0.00  
LOW / 3.000e+24 -2.000 0.00 /  
TROE/ 0.8 1e+30 1e-30 /  
C3H5+H<=>C3H4+H2 1.800e+13 0.000 0.00  
C3H5+O2<=>C3H4+HO2 4.990e+15 -1.400 22428.06  
C3H5+CH3<=>C3H4+CH4 3.000e+12 -0.320 -130.98  
C2H2+CH3(+M)<=>C3H5(+M) 6.000e+08 0.000 0.00  
LOW / 2.000e+09 1.000 0.00 /  
TROE/ 0.5 1e+30 1e-30 /  
C3H5+OH<=>C3H4+H2O 6.000e+12 0.000 0.00  
C3H3+HCO<=>C3H4+CO 2.500e+13 0.000 0.00  
C3H3+HO2<=>OH+CO+C2H3 8.000e+11 0.000 0.00  
C3H4+O2<=>CH3+HCO+CO 4.000e+14 0.000 41826.00  
C3H6+O<=>C2H5+HCO 3.500e+07 1.650 -972.75  
C3H6+OH<=>C3H5+H2O 3.100e+06 2.000 -298.28  
C3H6+O<=>CH2CO+CH3+H 1.200e+08 1.650 327.44  
C3H6+H<=>C3H5+H2 1.700e+05 2.500 2492.83  
C3H5+H(+M)<=>C3H6(+M) 2.000e+14 0.000 0.00  
AR/0.70/ H2/2.00/ H2O/6.00/ CO/1.50/ CO2/2.00/ CH4/2.00/ C2H6/3.00/  
LOW / 1.330e+60 -12.000 5967.97 /  
TROE/ 0.02 1097 1097 6860 /  
C3H5+HO2<=>C3H6+O2 2.660e+12 0.000 0.00  
C3H5+HO2<=>OH+C2H3+CH2O 3.000e+12 0.000 0.00

|                                                                     |            |         |                         |
|---------------------------------------------------------------------|------------|---------|-------------------------|
| C2H3+CH3(+M)<=>C3H6(+M)                                             | 2.500e+13  | 0.000   | 0.00                    |
| AR/0.70/ H2/2.00/ H2O/6.00/ CO/1.50/ CO2/2.00/ CH4/2.00/ C2H6/3.00/ |            |         |                         |
| LOW /                                                               | 4.270e+58  | -11.940 | 9770.55 /               |
| TROE/                                                               | 0.175      | 1341    | 6e+04 1.014e+04 /       |
| C3H8(+M)<=>CH3+C2H5(+M)                                             | 1.100e+17  | 0.000   | 84392.93                |
| LOW /                                                               | 5.830e+17  | 0.000   | 62978.01 /              |
| TROE/                                                               | 0.76       | 1.9e+03 | 38 /                    |
| C4H10(+M)<=>2C2H5(+M)                                               | 2.720e+15  | 0.000   | 75609.94                |
| LOW /                                                               | 4.720e+18  | 0.000   | 49580.07 /              |
| TROE/                                                               | 0.72       | 1500.00 | 1.0000E-10 1.0000E+10 / |
| C4H10+O2<=>PC4H9+HO2                                                | 6.000e+13  | 0.000   | 52340.11                |
| C4H10+O2<=>SC4H9+HO2                                                | 4.000e+13  | 0.000   | 49799.95                |
| C4H10+HO2<=>PC4H9+H2O2                                              | 4.080e+01  | 3.590   | 17159.89                |
| C4H10+HO2<=>SC4H9+H2O2                                              | 1.264e+02  | 3.370   | 13719.89                |
| C4H10+O<=>PC4H9+OH                                                  | 1.130E+14  | 0.000   | 7850.00                 |
| C4H10+O<=>SC4H9+OH                                                  | 5.620E+13  | 0.000   | 5200.00                 |
| C4H10+OH<=>PC4H9+H2O                                                | 1.054e+10  | 0.970   | 1586.04                 |
| C4H10+OH<=>SC4H9+H2O                                                | 9.340e+07  | 1.610   | -34.89                  |
| C4H10+H<=>H2+PC4H9                                                  | 2.8000E+06 | 2.540   | 6965.4                  |
| C4H10+H<=>H2+SC4H9                                                  | 1.6900E+06 | 2.400   | 4493.0                  |
| PC4H9<=>C2H5+C2H4                                                   | 3.504e+12  | 0.463   | 29469.89                |
| SC4H9<=>C3H6+CH3                                                    | 4.803e+10  | 1.044   | 30349.90                |
| C4H8<=>C3H5+CH3                                                     | 1.000e+16  | 0.000   | 72896.75                |
| C4H8+H<=>H2+C2H3+C2H4                                               | 6.600e+05  | 2.540   | 6763.86                 |
| SC4H9+O2<=>SC4H9O2                                                  | 7.500e+12  | 0.000   | 0.00                    |
| SC4H9O2<=>C4H8+HO2                                                  | 5.075E+42  | -9.410  | 41490.00                |
| PC4H9+O2<=>C4H8+HO2                                                 | 8.370e-01  | 3.590   | 12000.00                |
| END                                                                 |            |         |                         |
