# Supplementary material for: Mechanistic insights into the oxidative coupling of methane over a Li/MgO catalyst: an experimental and microkinetic modeling study
Source: Royal Society of Chemistry journal article supplement (doi:10.1039/d4cy01132e), 2024-01-01
Supplement: d4cy01132e3.pdf [file d4cy01132e3.pdf]

THERMO ALL

300.000 1000.000 5000.000  
N2 G 8/02N 2 0 0 OG 200.000 6000.000 1000. 1  
2.95257637E+00 1.39690040E-03-4.92631603E-07 7.86010195E-11-4.60755204E-15 2  
-9.23948688E+02 5.87188762E+00 3.53100528E+00-1.23660988E-04-5.02999433E-07 3  
2.43530612E-09-1.40881235E-12-1.04697628E+03 2.96747038E+00 0.00000000E+00 4  
AR g 5/97AR 1 0 0 OG 200.000 6000.000 1000. 1  
2.50000000E+00 0.00000000E+00 0.00000000E+00 0.00000000E+00 0.00000000E+00 2  
-7.45375000E+02 4.37967491E+00 2.50000000E+00 0.00000000E+00 0.00000000E+00 3  
0.00000000E+00 0.00000000E+00-7.45375000E+02 4.37967491E+00 0.00000000E+00 4  
HE g 5/97HE 1 0 0 OG 200.000 6000.000 1000. 1  
2.50000000E+00 0.00000000E+00 0.00000000E+00 0.00000000E+00 0.00000000E+00 2  
-7.45375000E+02 9.28723974E-01 2.50000000E+00 0.00000000E+00 0.00000000E+00 3  
0.00000000E+00 0.00000000E+00-7.45375000E+02 9.28723974E-01 0.00000000E+00 4  
C(S) T 3/10C 1 0 0 OS 200.000 6000.000 1000. 1  
1.59828070E+00 1.43065097E-03-5.09435105E-07 8.64401302E-11-5.34349530E-15 2  
-7.45940284E+02-9.30332005E+00-3.03744539E-01 4.36036227E-03 1.98268825E-06 3  
-6.43472598E-09 2.99601320E-12-1.09458288E+02 1.08301475E+00 0.00000000E+00 4  
O2 RUS 89O 2 0 0 OG 200.000 6000.000 1000. 1  
3.66096065E+00 6.56365811E-04-1.41149627E-07 2.05797935E-11-1.29913436E-15 2  
-1.21597718E+03 3.41536279E+00 3.78245636E+00-2.99673416E-03 9.84730201E-06 3  
-9.68129509E-09 3.24372837E-12-1.06394356E+03 3.65767573E+00 0.00000000E+00 4  
H2 tpi878H 2 0 0 OG 200.000 6000.000 1000. 1  
2.93286575E+00 8.26608026E-04-1.46402364E-07 1.54100414E-11-6.88804800E-16 2  
-8.13065581E+02-1.02432865E+00 2.34433112E+00 7.98052075E-03-1.94781510E-05 3  
2.01572094E-08-7.37611761E-12-9.17935173E+02 6.83010238E-01 0.00000000E+00 4  
H L 6/94H 1 0 0 OG 200.000 6000.000 1000. 1  
0.25000000E+01 0.00000000E+00 0.00000000E+00 0.00000000E+00 0.00000000E+00 2  
0.25473660E+05-0.44668285E+00 0.25000000E+01 0.00000000E+00 0.00000000E+00 3  
0.00000000E+00 0.00000000E+00 0.25473660E+05-0.44668285E+00 0.0000008 4  
O L 1/90O 1 0 0 OG 200.000 6000.000 1000. 1  
2.54363697E+00-2.73162486E-05-4.19029520E-09 4.95481845E-12-4.79553694E-16 2  
2.92260120E+04 4.92229457E+00 3.16826710E+00-3.27931884E-03 6.64306396E-06 3  
-6.12806624E-09 2.11265971E-12 2.91222592E+04 2.05193346E+00 0.00203 4  
OH IU3/03O 1H 1 0 OG 200.000 6000.000 1000. 1  
2.83853033E+00 1.10741289E-03-2.94000209E-07 4.20698729E-11-2.42289890E-15 2  
3.69780808E+03 5.84494652E+00 3.99198424E+00-2.40106655E-03 4.61664033E-06 3  
-3.87916306E-09 1.36319502E-12 3.36889836E+03-1.03998477E-01 0.0259 4  
OH\* ATcT AO 1H 1 0 OG 200.000 6000.000 1000. 1  
2.75582920E+00 1.39848756E-03-4.19428493E-07 6.33453282E-11-3.56042218E-15 2  
5.09751756E+04 5.62581429E+00 3.46084428E+00 5.01872172E-04-2.00254474E-06 3  
3.18901984E-09-1.35451838E-12 5.07349466E+04 1.73976415E+00 5.17770741E+04 4  
H2O L 5/89H 2O 1 0 OG 200.000 6000.000 1000. 1  
0.26770389E+01 0.29731816E-02-0.77376889E-06 0.94433514E-10-0.42689991E-14 2  
-0.29885894E+05 0.68825500E+01 0.41986352E+01-0.20364017E-02 0.65203416E-05 3  
-0.54879269E-08 0.17719680E-11-0.30293726E+05-0.84900901E+00 0.0259 4  
HO2 T 1/09H 1O 2 0 OG 200.000 5000.000 1000. 1  
4.17228741E+00 1.88117627E-03-3.46277286E-07 1.94657549E-11 1.76256905E-16 2  
3.10206839E+01 2.95767672E+00 4.30179807E+00-4.74912097E-03 2.11582905E-05 3  
-2.42763914E-08 9.29225225E-12 2.64018485E+02 3.71666220E+00 0.157 4  
H2O2 T 8/03H 2O 2 0 OG 200.000 6000.000 1000. 1  
4.57977305E+00 4.05326003E-03-1.29844730E-06 1.98211400E-10-1.13968792E-14 2  
-1.80071775E+04 6.64970694E-01 4.31515149E+00-8.47390622E-04 1.76404323E-05 3  
-2.26762944E-08 9.08950158E-12-1.77067437E+04 3.27373319E+00 0.0622 4  
C L 7/88C 1O 0H 0 OG 200.000 6000.000 1000. 1  
0.26055830E+01-0.19593434E-03 0.10673722E-06-0.16423940E-10 0.81870580E-15 2  
0.85411742E+05 0.41923868E+01 0.25542395E+01-0.32153772E-03 0.73379223E-06 3

-0.73223487E-09 0.26652144E-12 0.85442681E+05 0.45313085E+01 0.0555 4  
 CH IU3/03C 1H 1 0 OG 200.000 6000.000 1000. 1  
 0.25209369E+01 0.17653639E-02-0.46147660E-06 0.59289675E-10-0.33474501E-14 2  
 0.70946769E+05 0.74051829E+01 0.34897583E+01 0.32432160E-03-0.16899751E-05 3  
 0.31628420E-08-0.14061803E-11 0.70612646E+05 0.20842841E+01 0.124 4  
 CH\* EG4/09C 1H 1 0 OG 200.000 6000.000 1000. 1  
 2.78220752E+00 1.47246754E-03-4.63436227E-07 7.32736021E-11-4.19705404E-15 2  
 1.04547060E+05 5.17421018E+00 3.47250101E+00 4.26443626E-04-1.95181794E-06 3  
 3.51755043E-09-1.60436174E-12 1.04334869E+05 1.44799533E+00 1.05378099E+05 4  
 CH2 IU3/03C 1H 2 0 OG 200.000 6000.000 1000. 1  
 3.14631886E+00 3.03671259E-03-9.96474439E-07 1.50483580E-10-8.57335515E-15 2  
 4.60412605E+04 4.72341711E+00 3.71757846E+00 1.27391260E-03 2.17347251E-06 3  
 -3.48858500E-09 1.65208866E-12 4.58723866E+04 1.75297945E+00 0.133 4  
 CH2\* IU3/03C 1H 2 0 OG 200.000 6000.000 1000. 1  
 3.13501686E+00 2.89593926E-03-8.16668090E-07 1.13572697E-10-6.36262835E-15 2  
 5.05040504E+04 4.06030621E+00 4.19331325E+00-2.33105184E-03 8.15676451E-06 3  
 -6.62985981E-09 1.93233199E-12 5.03662246E+04-7.46734310E-01 5.15724919E+04 4  
 CH2(S) IU3/03C 1H 2 0 OG 200.000 6000.000 1000. 1  
 3.13501686E+00 2.89593926E-03-8.16668090E-07 1.13572697E-10-6.36262835E-15 2  
 5.05040504E+04 4.06030621E+00 4.19331325E+00-2.33105184E-03 8.15676451E-06 3  
 -6.62985981E-09 1.93233199E-12 5.03662246E+04-7.46734310E-01 5.15724919E+04 4  
 CH3 IU0702C 1H 3 0 OG 200.000 6000.000 1000. 1  
 0.29781206E+01 0.57978520E-02-0.19755800E-05 0.30729790E-09-0.17917416E-13 2  
 0.16509513E+05 0.47224799E+01 0.36571797E+01 0.21265979E-02 0.54583883E-05 3  
 -0.66181003E-08 0.24657074E-11 0.16422716E+05 0.16735354E+01 0.079 4  
 CH4 g 8/99C 1H 4 0 OG 200.000 6000.000 1000. 1  
 1.65326226E+00 1.00263099E-02-3.31661238E-06 5.36483138E-10-3.14696758E-14 2  
 -1.00095936E+04 9.90506283E+00 5.14911468E+00-1.36622009E-02 4.91453921E-05 3  
 -4.84246767E-08 1.66603441E-11-1.02465983E+04-4.63848842E+00 0.0554 4  
 CO RUS 79C 1O 1H 0 OG 200.000 6000.000 1000. 1  
 0.30484859E+01 0.13517281E-02-0.48579405E-06 0.78853644E-10-0.46980746E-14 2  
 -0.14266117E+05 0.60170977E+01 0.35795335E+01-0.61035369E-03 0.10168143E-05 3  
 0.90700586E-09-0.90442449E-12-0.14344086E+05 0.35084093E+01 0.0251 4  
 CO2 L 7/88C 1O 2H 0 OG 200.000 6000.000 1000. 1  
 0.46365111E+01 0.27414569E-02-0.99589759E-06 0.16038666E-09-0.91619857E-14 2  
 -0.49024904E+05-0.19348955E+01 0.23568130E+01 0.89841299E-02-0.71220632E-05 3  
 0.24573008E-08-0.14288548E-12-0.48371971E+05 0.99009035E+01 0.014 4  
 HCO T 5/03C 1H 1O 1 OG 200.000 6000.000 1000. 1  
 3.92001542E+00 2.52279324E-03-6.71004164E-07 1.05615948E-10-7.43798261E-15 2  
 3.65342928E+03 3.58077056E+00 4.23754610E+00-3.32075257E-03 1.40030264E-05 3  
 -1.34239995E-08 4.37416208E-12 3.87241185E+03 3.30834869E+00 0.101 4  
 HOCO ATcT/AC 1O 2H 1 OG 200.000 6000.000 1000. 1  
 5.39206152E+00 4.11221455E-03-1.48194900E-06 2.39875460E-10-1.43903104E-14 2  
 -2.38606717E+04-2.23529091E+00 2.92207919E+00 7.62453859E-03 3.29884437E-06 3  
 -1.07135205E-08 5.11587057E-12-2.30281524E+04 1.12925886E+01-2.18076591E+04 4  
 CH2O g 8/88H 2C 1O 1 OG 200.000 6000.000 1000. 1  
 3.16952665E+00 6.19320560E-03-2.25056366E-06 3.65975660E-10-2.20149458E-14 2  
 -1.45486831E+04 6.04207898E+00 4.79372312E+00-9.90833322E-03 3.73219990E-05 3  
 -3.79285237E-08 1.31772641E-11-1.43791953E+04 6.02798058E-01 0.101 4  
 CH2OH IU2/03C 1H 3O 1 OG 200.000 6000.000 1000. 1  
 5.09314370E+00 5.94761260E-03-2.06497460E-06 3.23008173E-10-1.88125902E-14 2  
 -4.03409640E+03-1.84691493E+00 4.47834367E+00-1.35070310E-03 2.78484980E-05 3  
 -3.64869060E-08 1.47907450E-11-3.50072890E+03 3.30913500E+00 0.422 4  
 CH3O IU1/03C 1H 3O 1 OG 200.000 6000.000 1000. 1  
 4.75779238E+00 7.44142474E-03-2.69705176E-06 4.38090504E-10-2.63537098E-14 2  
 3.78111940E+02-1.96680028E+00 3.71180502E+00-2.80463306E-03 3.76550971E-05 3  
 -4.73072089E-08 1.86588420E-11 1.29569760E+03 6.57240864E+00 0.35 4

CH3OH T06/02C 1H 4O 1 OG 200.000 6000.000 1000. 1  
 3.52726795E+00 1.03178783E-02-3.62892944E-06 5.77448016E-10-3.42182632E-14 2  
 -2.60028834E+04 5.16758693E+00 5.65851051E+00-1.62983419E-02 6.91938156E-05 3  
 -7.58372926E-08 2.80427550E-11-2.56119736E+04-8.97330508E-01 0.169 4  
 CH3O2 T04/10C 1H 3O 2 OG 200.000 6000.000 1000. 1  
 5.55530486E+00 9.12236137E-03-3.23851661E-06 5.18713798E-10-3.08834151E-14 2  
 -1.03569402E+03-3.99158547E+00 4.97169544E+00-5.29356557E-03 4.77334149E-05 3  
 -5.77065617E-08 2.22219969E-11-1.29022161E+02 2.81501182E+00 1.43618036E+03 4  
 CH3O2H A 7/05C 1H 4O 2 OG 200.000 6000.000 1000. 1  
 7.76538058E+00 8.61499712E-03-2.98006935E-06 4.68638071E-10-2.75339255E-14 2  
 -1.82979984E+04-1.43992663E+01 2.90540897E+00 1.74994735E-02 5.28243630E-06 3  
 -2.52827275E-08 1.34368212E-11-1.68894632E+04 1.13741987E+01-1.52423685E+04 4  
 C2H T 5/10C 2H 1 0 OG 200.000 6000.000 1000. 1  
 3.66270248E+00 3.82492252E-03-1.36632500E-06 2.13455040E-10-1.23216848E-14 2  
 6.71683790E+04 3.92205792E+00 2.89867676E+00 1.32988489E-02-2.80733327E-05 3  
 2.89484755E-08-1.07502351E-11 6.70616050E+04 6.18547632E+00 0.163 4  
 C2H2 g 1/91C 2H 2 0 OG 200.000 6000.000 1000. 1  
 4.65878489E+00 4.88396667E-03-1.60828888E-06 2.46974544E-10-1.38605959E-14 2  
 2.57594042E+04-3.99838194E+00 8.08679682E-01 2.33615762E-02-3.55172234E-05 3  
 2.80152958E-08-8.50075165E-12 2.64289808E+04 1.39396761E+01 0.142 4  
 H2CC L12/89H 2C 2 0 OG 200.000 6000.000 1000.000 1  
 4.27807305E+00 4.75622626E-03-1.63007378E-06 2.54622680E-10-1.48860086E-14 2  
 4.80140478E+04 6.39978600E-01 3.28154941E+00 6.97642650E-03-2.38527914E-06 3  
 -1.21077631E-09 9.82041734E-13 4.83191706E+04 5.92035686E+00 0.61 4  
 C2H3 ATcT/AC 2H 3 0 OG 200.000 6000.000 1000. 1  
 4.15026763E+00 7.54021341E-03-2.62997847E-06 4.15974048E-10-2.45407509E-14 2  
 3.38566380E+04 1.72812235E+00 3.36377642E+00 2.65765722E-04 2.79620704E-05 3  
 -3.72986942E-08 1.51590176E-11 3.44749589E+04 7.91510092E+00 0.454 4  
 C2H4 g 1/00C 2H 4 0 OG 200.000 6000.000 1000. 1  
 3.99182724E+00 1.04833908E-02-3.71721342E-06 5.94628366E-10-3.53630386E-14 2  
 4.26865851E+03-2.69081762E-01 3.95920063E+00-7.57051373E-03 5.70989993E-05 3  
 -6.91588352E-08 2.69884190E-11 5.08977598E+03 4.09730213E+00 0.142 4  
 C2H5 IU1/07C 2H 5 0 OG 200.000 6000.000 1000. 1  
 4.32195633E+00 1.23930542E-02-4.39680960E-06 7.03519917E-10-4.18435239E-14 2  
 1.21759475E+04 1.71103809E-01 4.24185905E+00-3.56905235E-03 4.82667202E-05 3  
 -5.85401009E-08 2.25804514E-11 1.29690344E+04 4.44703782E+00 1.43965189E+04 4  
 C2H6 g 8/88C 2H 6 0 OG 200.000 6000.000 1000. 1  
 4.04666411E+00 1.53538802E-02-5.47039485E-06 8.77826544E-10-5.23167531E-14 2  
 -1.24473499E+04-9.68698313E-01 4.29142572E+00-5.50154901E-03 5.99438458E-05 3  
 -7.08466469E-08 2.68685836E-11-1.15222056E+04 2.66678994E+00 0.159 4  
 C2H5OH L 8/88C 2H 6O 1 OG 200.000 6000.000 1000. 1  
 0.65624365E+01 0.15204222E-01-0.53896795E-05 0.86225011E-09-0.51289787E-13 2  
 -0.31525621E+05-0.94730202E+01 0.48586957E+01-0.37401726E-02 0.69555378E-04 3  
 -0.88654796E-07 0.35168835E-10-0.29996132E+05 0.48018545E+01-0.28257829E+05 4  
 CH3OCH3 T03/10C 2H 6O 1 OG 200.000 6000.000 1000. 1  
 5.64844274E+00 1.63381875E-02-5.86802189E-06 9.46836384E-10-5.66504295E-14 2  
 -2.50864216E+04-5.96267354E+00 5.30562273E+00-2.14253958E-03 5.30873092E-05 3  
 -6.23146897E-08 2.30730916E-11-2.39655820E+04 7.13244569E-01-2.21221696E+04 4  
 CH2CH2OH T05/11C 2H 5O 1 OG 200.000 6000.000 1000. 1  
 7.01348674E+00 1.20204391E-02-4.21992012E-06 6.70675981E-10-3.97135273E-14 2  
 -6.16161779E+03-8.62052409E+00 4.20954137E+00 9.12964578E-03 2.47462263E-05 3  
 -3.92945764E-08 1.66541312E-11-4.91511371E+03 8.30445413E+00-3.10541451E+03 4  
 CH3CHOH T06/11C 2H 5O 1 OG 200.000 6000.000 1000. 1  
 6.35842302E+00 1.24356276E-02-4.33096839E-06 6.84530381E-10-4.03713238E-14 2  
 -9.53018581E+03-6.05106112E+00 4.22283250E+00 5.12174798E-03 3.48386522E-05 3  
 -4.91943637E-08 2.01183723E-11-8.35622088E+03 8.01675700E+00-6.64945980E+03 4  
 CH3CH2O T06/11C 2H 5O 1 OG 200.000 6000.000 1000. 1

6.55053877E+00 1.32525511E-02-4.74726060E-06 7.64699226E-10-4.57008357E-14 2  
-4.47191998E+03-9.61231141E+00 3.26905655E+00 9.33562904E-03 2.96317166E-05 3  
-4.53411341E-08 1.88795595E-11-2.95022955E+03 1.04200942E+01-1.37951605E+03 4  
CH3OCH2 A10/04C 2H 5O 1 OG 200.000 6000.000 1000. 1  
5.94067593E+00 1.29906358E-02-4.56921036E-06 7.26888932E-10-4.30599587E-14 2  
-2.58503562E+03-4.52841964E+00 4.53195381E+00 7.81884271E-03 1.94968539E-05 3  
-2.74538336E-08 1.06521135E-11-1.70629244E+03 5.06122980E+00 1.15460803E+02 4  
CH2OCH2 L 8/88C 2H 4O 1 OG 200.000 6000.000 1000. 1  
0.54887641E+01 0.12046190E-01-0.43336931E-05 0.70028311E-09-0.41949088E-13 2  
-0.91804251E+04-0.70799605E+01 0.37590532E+01-0.94412180E-02 0.80309721E-04 3  
-0.10080788E-06 0.40039921E-10-0.75608143E+04 0.78497475E+01 0.425 4  
CH3CHO L 8/88C 2H 4O 1 OG 200.000 6000.0 1000.0 1  
0.54041108E+01 0.11723059E-01-0.42263137E-05 0.68372451E-09-0.40984863E-13 2  
-0.22593122E+05-0.34807917E+01 0.47294595E+01-0.31932858E-02 0.47534921E-04 3  
-0.57458611E-07 0.21931112E-10-0.21572878E+05 0.41030159E+01 0.307 4  
C2H3OH T03/10C 2H 4O 1 OG 200.000 6000.000 1000. 1  
7.49818166E+00 1.03957000E-02-3.66891058E-06 5.85205827E-10-3.47373827E-14 2  
-1.81643092E+04-1.38388104E+01 2.28758479E+00 1.97013262E-02 1.96382662E-06 3  
-1.94389758E-08 1.02616778E-11-1.65373421E+04 1.41333462E+01-1.49958566E+04 4  
C2H3O A 1/05C 2H 3O 1 OG 200.000 6000.000 1000. 1  
5.60158035E+00 9.17613962E-03-3.28028902E-06 5.27903888E-10-3.15362241E-14 2  
1.71446252E+04-5.47228512E+00 3.58349017E+00-6.02275805E-03 6.32426867E-05 3  
-8.18540707E-08 3.30444505E-11 1.85681353E+04 9.59725926E+00 1.97814471E+04 4  
CH3CO IU2/03C 2H 3O 1 OG 200.000 6000.000 1000. 1  
0.53137165E+01 0.91737793E-02-0.33220386E-05 0.53947456E-09-0.32452368E-13 2  
-0.36450414E+04-0.16757558E+01 0.40358705E+01 0.87729487E-03 0.30710010E-04 3  
-0.39247565E-07 0.15296869E-10-0.26820738E+04 0.78617682E+01 0.385 4  
CH2CHO T04/06C 2H 3O 1 OG 200.000 6000.000 1000. 1  
5.91636535E+00 8.84650426E-03-3.14954895E-06 5.05413189E-10-3.01304621E-14 2  
-1.04779892E+03-6.10649981E+00 2.66873956E+00 9.62329538E-03 1.60617438E-05 3  
-2.87681820E-08 1.25030066E-11 2.19438429E+02 1.25694476E+01 8.0 4  
CH2CO g 4/02C 2H 2O 1 OG 200.000 6000.000 1000. 1  
5.75871449E+00 6.35124053E-03-2.25955361E-06 3.62321512E-10-2.15855515E-14 2  
-8.08533464E+03-4.96490444E+00 2.13241136E+00 1.81319455E-02-1.74093315E-05 3  
9.35336040E-09-2.01724844E-12-7.14808520E+03 1.33807969E+01 0.144 4  
HCCOH T12/09C 2H 2O 1 OG 200.000 6000.000 1000.0 1  
6.37509678E+00 5.49429011E-03-1.88136576E-06 2.93803536E-10-1.71771901E-14 2  
8.93277676E+03-8.24498007E+00 2.05541154E+00 2.52003372E-02-3.80821654E-05 3  
3.09890632E-08-9.89799902E-12 9.76872113E+03 1.22271534E+01 1.33 4  
HCCO T 4/09H 1C 2O 1 OG 200.000 6000.000 1000. 1  
5.91479333E+00 3.71408730E-03-1.30137010E-06 2.06473345E-10-1.21476759E-14 2  
1.93596301E+04-5.50567269E+00 1.87607969E+00 2.21205418E-02-3.58869325E-05 3  
3.05402541E-08-1.01281069E-11 2.01633840E+04 1.36968290E+01 0.585 4  
C2O T 8/11C 2O 1 0 OG 200.000 6000.000 1000.0 1  
5.42468378E+00 1.85393945E-03-5.17932956E-07 6.77646230E-11-3.53315237E-15 2  
4.37161379E+04-3.69608405E+00 2.86278214E+00 1.19701204E-02-1.80851222E-05 3  
1.52777730E-08-5.20063163E-12 4.43125964E+04 8.89759099E+00 1.2 4  
C3H2 102193H 2C 3 G 0150.00 4000.00 1000.00 1  
0.07670981E+02 0.02748749E-01-0.04370943E-05-0.06455599E-09 0.01663887E-12 2  
0.06259722E+06-0.01236890E+03 0.03166714E+02 0.02482572E+00-0.04591637E-03 3  
0.04268019E-06-0.01482152E-09 0.06350421E+06 0.08869446E+02 4  
C3H3 U12/77C 3H 3 0 OG 300.000 5000.000 1000.00 1  
0.80916252E+01 0.37372850E-02 0.13886647E-05-0.12298604E-08 0.20681585E-12 2  
0.35437793E+05-0.18204468E+02 0.25097322E+01 0.17103866E-01-0.45710858E-05 3  
-0.82841574E-08 0.54362287E-11 0.37040680E+05 0.11011264E+02 4  
C3H4 40687C 3H 4 G 0300.00 5000.00 1000.00 1  
0.05729144E+02 0.12368045E-01-0.04805626E-04 0.08601364E-08-0.05812802E-12 2

0.02012984E+06-0.09448668E+02-0.02131968E+01 0.03358713E+00-0.03804870E-03 3  
0.02745838E-06-0.08690044E-10 0.02162048E+06 0.02029392E+03 4  
C3H5 ALLYL T12/91C 3H 5 0 OG 200.000 6000.000 1000.00 1  
0.65475473D+01 0.13315318D-01-0.47833809D-05 0.77195924D-09-0.46193680D-13 2  
0.17282327D+05-0.92745370D+01 0.37878186D+01 0.94851495D-02 0.24231843D-04 3  
-0.36557902D-07 0.14858341D-10 0.18636957D+05 0.78287037D+01 0.20336737D+05 4  
C3H6 120186C 3H 6 G 0300.00 5000.00 1000.00 1  
0.06732257E+02 0.14908336E-01-0.04949899E-04 0.07212022E-08-0.03766204E-12 2  
-0.09235703E+04-0.13313348E+02 0.14933071E+01 0.02092517E+00 0.04486794E-04 3  
-0.16689121E-07 0.07158146E-10 0.10748264E+04 0.16145340E+02 4  
C3H7 L 9/84C 3H 7 G 300.000 5000.000 1000.000 1  
0.77026987E+01 0.16044203E-01-0.52833220E-05 0.76298590E-09-0.39392284E-13 2  
0.82984336E+04-0.15480180E+02 0.10515518E+01 0.25991980E-01 0.23800540E-05 3  
-0.19609569E-07 0.93732470E-11 0.10631863E+05 0.21122559E+02 4  
C3H8 120186C 3H 8 G 0300.00 5000.00 1000.00 1  
0.07525217E+02 0.01889034E+00-0.06283924E-04 0.09179373E-08-0.04812410E-12 2  
-0.16464548E+05-0.01784390E+03 0.08969208E+01 0.02668986E+00 0.05431425E-04 3  
-0.02126000E-06 0.09243330E-10-0.13954918E+05 0.01935533E+03 4  
T-CH2 000000H 2C 1 G 300 5000 1000 1  
2.87410113E+00 3.65639292E-03-1.40894597E-06 2.60179549E-10-1.87727567E-14 2  
4.62636040E+04 6.17119324E+00 3.76267867E+00 9.68872143E-04 2.79489841E-06 3  
-3.85091153E-09 1.68741719E-12 4.60040401E+04 1.56253185E+00 4  
S-CH2 000000H 2C 1 G 300 5000 1000 1  
2.29203842E+00 4.65588637E-03-2.01191947E-06 4.17906000E-10-3.39716365E-14 2  
5.09259997E+04 8.62650169E+00 4.19860411E+00-2.36661419E-03 8.23296220E-06 3  
-6.68815981E-09 1.94314737E-12 5.04968163E+04-7.69118967E-01 4  
C2H4OOH 000000H 5O 2C 2 G 300 5000 1000 1  
1.16258666E+01 1.00826346E-02-3.47934362E-06 5.43394220E-10-3.16569294E-14 2  
-9.10568267E+02-3.18522902E+01 8.13237801E-01 3.90063400E-02-3.40643855E-05 3  
1.55066226E-08-2.84069840E-12 2.50785787E+03 2.49684459E+01 4  
OC2H3OOH 000000H 4O 3C 2 G 300 5000 1000 1  
1.24064339E+01 9.47233784E-03-3.28107928E-06 5.13772211E-10-2.99872803E-14 2  
-3.49123142E+04-3.39479874E+01 5.52382546E+00 2.42068306E-02-1.52898974E-05 3  
5.01728362E-09-6.96406358E-13-3.23406789E+04 3.57240645E+00 4  
C2H4O 000000H 4O 1C 2 G 300 5000 1000 1  
5.40411080E+00 1.17230590E-02-4.22631370E-06 6.83724510E-10-4.09848630E-14 2  
-2.25931220E+04-3.48079170E+00 4.72945950E+00-3.19328580E-03 4.75349210E-05 3  
-5.74586110E-08 2.19311120E-11-2.15728780E+04 4.10301590E+00 4  
I-C3H7 000000H 7C 3 G 300 5000 1000 1  
6.51927410E+00 1.72201040E-02-5.73642170E-06 8.41307320E-10-4.45659130E-14 2  
7.32271930E+03-9.08302150E+00 1.44491990E+00 2.09991120E-02 7.70362220E-06 3  
-1.84762530E-08 7.12829620E-12 9.42237240E+03 2.01163170E+01 4  
N-C3H7 000000H 7C 3 G 300 5000 1000 1  
7.70974790E+00 1.60314850E-02-5.27202380E-06 7.58883520E-10-3.88627190E-14 2  
7.97622360E+03-1.55152970E+01 1.04911730E+00 2.60089730E-02 2.35425160E-06 3  
-1.95951320E-08 9.37202070E-12 1.03123460E+04 2.11360340E+01 4  
C3H6OOH 000000H 7O 2C 3 G 300 5000 1000 1  
1.46139980E+01 1.43723015E-02-4.88635144E-06 7.56519620E-10-4.38364992E-14 2  
-6.46101457E+03-4.57478245E+01 1.91005011E+00 4.11666833E-02-2.51630217E-05 3  
7.11856873E-09-6.98838732E-13-1.79305093E+03 2.34514457E+01 4  
OC3H5OOH 000000H 6O 3C 3 G 300 5000 1000 1  
1.70285271E+01 1.30716784E-02-4.59310856E-06 7.26135156E-10-4.26658337E-14 2  
-4.16334217E+04-5.92513577E+01 7.68933034E-01 5.46905880E-02-4.65072405E-05 3  
2.03159585E-08-3.58398999E-12-3.63238861E+04 2.68291637E+01 4  
C4H10 8/4/4 THERMC 4H 10 0 OG 300.000 5000.000 1392.000 31  
1.24940183E+01 2.17726258E-02-7.44272215E-06 1.15487023E-09-6.69712949E-14 2  
-2.18403437E+04-4.45558921E+01-4.55756824E-01 4.80323389E-02-2.65497552E-05 3

6.92544700E-09-6.38317504E-13-1.68960904E+04 2.64870966E+01 4  
 PC4H9 8/4/4 THERMC 4H 9 0 0G 300.000 5000.000 1391.000 31  
 1.20779744E+01 1.96264778E-02-6.71302199E-06 1.04206424E-09-6.04469282E-14 2  
 3.22550473E+03-3.87719384E+01 3.20730933E-01 4.34654454E-02-2.40584970E-05 3  
 6.28245308E-09-5.80113166E-13 7.71490893E+03 2.57301085E+01 4  
 SC4H9 8/4/4 THERMC 4H 9 0 0G 300.000 5000.000 1381.000 31  
 1.16934304E+01 1.96402287E-02-6.65306517E-06 1.02631895E-09-5.92826294E-14 2  
 1.96382429E+03-3.61626672E+01 8.49159986E-01 3.82085320E-02-1.49626797E-05 3  
 2.04499211E-10 8.24254437E-13 6.38832956E+03 2.44466606E+01 4  
 C4H8 C 4H 80 00 0G 300.00 5000.00 1000.00 1  
 0.20535840E+01 0.34350500E-01-0.15883196E-04 0.33089660E-08-0.25361040E-12 2  
 -0.21397230E+04 0.15543201E+02 0.11811380E+01 0.30853380E-01 0.50865240E-05 3  
 -0.24654880E-07 0.11110192E-10-0.17904000E+04 0.21062470E+02 4  
 CHCHO H 2 C 2 O 1 G 200.0 3000.0 1000.0 1  
 5.96287949E+00 7.99898746E-03-4.30605647E-06 1.11076174E-09-1.11415021E-13 2  
 2.87255915E+04-5.17392496E+00 2.06863692E+00 1.87233234E-02-1.21318942E-05 3  
 -3.33726595E-10 2.32881768E-12 2.97393543E+04 1.47865706E+01 4  
 SC4H9O2 7/19/0 THERMC 4H 9O 2 0G 300.000 5000.000 1389.000 41  
 1.64031135E+01 2.09361006E-02-7.23393011E-06 1.13058996E-09-6.58938667E-14 2  
 -1.85074517E+04-5.77331636E+01 1.32689044E+00 5.62785583E-02-4.01717786E-05 3  
 1.57120967E-08-2.62948443E-12-1.31557057E+04 2.34069659E+01 4  
 END
